# 1 Crowding-induced phase separation and solidification by 2 co-condensation of PEG in NPM1-rRNA condensates

3 Alain A.M. André<sup>1</sup>, N. Amy Yewdall<sup>1</sup>, Evan Spruijt<sup>1\*</sup>

4 <sup>1</sup> Institute for Molecules and Materials, Radboud University, Heyendaalseweg 135, 6525 AJ Nijmegen,  
5 the Netherlands. \* Correspondence: e.spruijt@science.ru.nl

## 6 7 **ABSTRACT**

8 The crowdedness of the cell calls for adequate intracellular organization. Biomolecular condensates, formed  
9 by liquid-liquid phase separation of intrinsically disordered proteins and nucleic acids, are important  
10 organizers of cellular fluids. To underpin the molecular mechanisms of protein condensation, cell-free  
11 studies are often used where the role of crowding is not investigated in detail. Here, we investigate the  
12 effects of macromolecular crowding on the formation and material properties of a model heterotypic  
13 biomolecular condensate, consisting of nucleophosmin (NPM1) and ribosomal RNA (rRNA). We studied  
14 the effect of the macromolecular crowding agent PEG, which is often considered an inert crowding agent.  
15 We observed that PEG could induce both homotypic and heterotypic phase separation of NPM1 and NPM1-  
16 rRNA, respectively. Crowding increases the condensed concentration of NPM1 and decreases its  
17 equilibrium dilute phase concentration, while no significant change in the concentration of rRNA in the  
18 dilute phase was observed. Interestingly, the crowder itself is concentrated in the condensates, suggesting  
19 that co-condensation rather than excluded volume interactions underlie the enhanced phase separation by  
20 PEG. Fluorescence recovery after photobleaching (FRAP) measurements indicated that both NPM1 and  
21 rRNA become immobile at high PEG concentrations, indicative of a liquid-to-gel transition. Together, these  
22 results shed new light onto the role of synthetic crowding agents in phase separation, and demonstrate that  
23 condensate properties determined *in vitro* depend strongly on the addition of crowding agents.

## 24 25 **STATEMENT OF SIGNIFICANCE**

26 *Liquid-liquid phase separation of proteins and nucleic acids leads to the formation of biomolecular*  
27 *condensates. To mimic biomolecular condensates in vitro, polymeric crowding agents, such as PEG, are*  
28 *often added. Such crowding agents are considered to make in vitro solutions more physiologically relevant,*  
29 *by mimicking the high cellular macromolecule concentrations. However, these crowding agents are*  
30 *commonly selected for their commercial availability and solubility in water, and their influence on phase*  
31 *separation and the physicochemical properties of condensates are seldom studied. Here we use biophysical*  
32 *methods to show that PEG induces phase separation of a model condensate through co-condensation rather*  
33 *than volume exclusion. As a consequence, crowding changes the partitioning, concentrations and*  
34 *viscoelastic properties of the condensates significantly, which sheds new light onto studies aimed at*  
35 *quantifying the material properties of biomolecular condensates.*

## 36 INTRODUCTION

37 One of the most fascinating aspects of the inner biochemistry of a cell is how it functions in an extremely  
38 crowded environment. Typical estimates indicate that cellular biopolymers, including proteins and RNA,  
39 occupy 20 to 30 vol% of the cell, limiting intracellular diffusion and making the cell's interior a very  
40 crowded place (1-3). To enable effective biomolecular reactions, the cellular organization is of great  
41 importance (4,5). Traditionally, membrane-bound organelles have been extensively studied for their roles  
42 in organizing biochemical processes. This research has recently entered a new phase, as biomolecular  
43 condensates, also referred to as membraneless organelles, were found to be involved in the regulation of  
44 several biological processes, including transcription (6-8), cell signalling (9,10) and ribosome biogenesis  
45 (11-13).

46 Biomolecular condensates benefit from the absence of a physical membrane barrier, giving these  
47 condensates dynamic properties: they can fuse, ripen and wet membranes or become engulfed by other  
48 condensates (14). This reflects the molecular nature of these condensates: they are typically enriched in  
49 proteins containing intrinsically disordered regions (IDRs) and nucleic acids (11,15). The IDRs are not only  
50 disordered, they also contain certain repetitive motifs, for example in the form of weakly charged patches  
51 (16,17). Condensation is typically driven by liquid-liquid phase separation (LLPS) of these sticky moieties  
52 in the IDRs, but it is not limited to IDRs, as structural domains have been found to act as effective stickers  
53 as well (18-20). The balance between intermolecular association being not too strong to avoid turning the  
54 condensate into a gel, and not too weak to avoid dissolving it, makes most condensates highly responsive  
55 to changes in their environment, such as salinity and crowding, or subtle changes to the molecular  
56 constituents, such as enzymatic product formation or post-translational modifications (4,21).

57 Many of the molecular mechanisms underlying condensate formation and phase behavior have been  
58 unravelled through *in vitro* (here: cell-free) experiments (22-25). However, the cell-free environment in  
59 which proteins are studied is often far from realistic intracellular conditions. Factors that are typically  
60 regulated in what are considered to be 'physiological' conditions include ionic strength, pH and temperature  
61 (26). In contrast, the high degree of crowding in a living cell is not commonly taken into account in cell-  
62 free experiments despite the fact that many studies have shown that crowding can have a significant effect  
63 on protein stability, complexation and reactivity (3,4,27,28). When crowding is taken into account, the  
64 crowded cellular milieu is often mimicked by the addition of water-soluble polymers such as poly(ethylene  
65 glycol) (PEG), Ficoll and dextran (29-34). Although these polymers are highly water soluble, PEG and  
66 dextran can also undergo segregative phase separation, ending up in separate phases (35,36). This indicates  
67 that they have non-negligible interactions with each other, and suggests that these and other crowding  
68 agents could also interact with disordered and structured biomolecules, and affect their phase behavior.  
69 Therefore, a systematic study of the effect of crowding agents on commonly studied biomolecular  
70 condensates is of great relevance to understand the role of crowding in LLPS.

71 Crowding agents can affect biomolecular condensates in three ways. (i) They could promote (or in  
72 theory also suppress) phase separation by enhancing the weak intermolecular interactions through excluded

73 volume effects or co-condensation, thereby shifting the binodal line to lower concentrations (37). (ii)  
74 Crowding agents can co-localize into the dense phase, as has been observed for dextran (38). This may be  
75 caused by the distinct local chemical environment (for instance nuage bodies are thought to have more  
76 hydrophobic interior (22)), but the change in composition could also lead to a further change in the local  
77 environment. (iii) Finally, the enhanced intermolecular interactions and altered composition could result in  
78 a change of the biophysical properties. For example, the condensed phase could become more viscous or  
79 switch to a solid-like state, such as previously observed for FUS (39) and NPM1 (29).

80 Here, we investigate the presence of these three effects in a well-studied condensate model of NPM1-  
81 rRNA using the most prevalent crowding agent found in studies of protein phase separation, PEG. We show  
82 that PEG induces both homotypic and heterotypic phase separation, and quantified the changes in the dilute  
83 and condensed phase. We observed the strongest crowding effect for NPM1, while there was no significant  
84 effect on rRNA in the dilute phase. Through confocal microscopy we were able to prove that PEG weakly  
85 partitions into the condensed phase, where it causes a differential increase in the NPM1 and rRNA density,  
86 thereby altering the condensate composition. Finally, using fluorescence recovery after photobleaching  
87 (FRAP) we measured the viscoelastic properties of both NPM1 and rRNA, which showed a rapid decrease  
88 of the mobile fraction in the presence of PEG.

89

## 90 **MATERIALS AND METHODS**

### 91 **Materials**

92 Unless otherwise stated all chemical were purchased from Sigma-Aldrich. All aqueous solutions were  
93 prepared in Milli-Q water (18.2 M $\Omega$ cm), except for the rRNA stock solution which was dissolved in  
94 nuclease free water (Invitrogen).

95

### 96 **Protein expression and purification**

97 *E.coli* BL21 (DE3) were transformed with pET28a(+)-NPM1-wt. Bacterial cell cultures were grown in Luria  
98 Broth (LB-broth) supplemented with 50  $\mu$ g L<sup>-1</sup> kanamycin at 37 °C till OD<sub>600</sub> reached 0.6-0.8 before  
99 expression was induced with 1 mM IPTG. Protein expression was carried out overnight at 18 °C and pelleted  
100 through centrifugation. Pellets were either stored at -80°C or directly used for purification. For purification,  
101 pellets were thawed on ice and resuspended in lysis buffer (10 mM Tris-HCl, pH 7.5, 300 mM NaCl, 20  
102 mM imidazole) supplemented with 5 mM  $\beta$ -mercaptoethanol, 1 $\times$  protease inhibitor (Roche), and 10 mM  
103 PMSF. Cell suspensions were either lysed by sonication (Sanyo Soniprep 500) or French Press  
104 homogenizer (Homogenizing Systems LTD). The lysate was cleared through centrifugation at 20,000 g at  
105 4 °C for 30 minutes in a Beckman JA25.50 rotor. The supernatant was loaded on an equilibrated 5 mL His-  
106 trap column (GE healthcare/Cytiva) at 4 °C. The loaded column was washed with 10 column volumes (CV)  
107 lysis buffer and eluted with 3 CV elution buffer (20 mM Tris-HCl, pH 7.5, 300 mM NaCl, 5 mM  $\beta$ -  
108 mercaptoethanol, 500 mM imidazole). Protein containing fractions were dialysed overnight against SEC-

109 buffer (10 mM Tris-HCl, pH 7.5, 300 mM NaCl, 1 mM DTT) and concentrated to <5 mL. The concentrated  
110 protein sample was loaded on a Superdex 200 16/600 (GE-healthcare) size exclusion column connected to  
111 an AKTA Basic FPLC (GE Healthcare) in SEC-buffer. Elution was carried out at room temperature at 1  
112 mL/min and monitored at 205 nm, 254 nm and 280 nm. Fractions of the main peak were pooled, and  
113 concentrated. The concentration was determined using the NanoDrop One<sup>C</sup> (Thermo Scientific), and  
114 aliquots were snap frozen in liquid nitrogen and stored at -80 °C.

115

#### 116 **NPM1-Alexa488 labelling**

117 NPM1-wt was labelled using AlexaFluor488 C5 maleimide dye (Thermo Fisher) according manufacturer's  
118 protocol. In short, 100 µM NPM1 was dialysed against 10 mM Tris-HCl, pH 7.5, 300 mM NaCl, 1 mM  
119 TCEP. Using a Millipore spin filter (MWCO: 10 kDa), the excess TCEP was removed, and 200 µM  
120 AlexaFluor488 C5 maleimide dye was added, and incubated overnight at 4 °C. Excess dye was removed  
121 through dialysis (Millipore, MWCO 3.5 kDa) against SEC buffer, and the concentration was determined  
122 using the NanoDrop One<sup>C</sup>.

123

#### 124 **Ribosomal RNA isolation**

125 *E. coli* (DE3) pLysS cells were grown at 37 °C in LB-broth till OD<sub>600</sub> reached 1.2, and pelleted through  
126 centrifugation (5,000 g at 4 °C for 15 minutes). Pellets were washed twice in S30 buffer A (50 mM Tris-  
127 HCl, pH 7.7, 60 mM potassium glutamate, 14 mM magnesium glutamate, 2 mM DTT), and resuspended  
128 in S30 buffer A (1 mL buffer to 1 gram cell pellet). This cell suspension was then homogenized through  
129 sonication (Sanyo Soniprep 150) and cleared through centrifugation (15,000 rpm at 4 °C for 25 minutes) in  
130 a Beckman JA25.50 rotor. Ribosomes were isolated by ultracentrifugation for 3 hours at 50,000 rpm  
131 (Beckman-Coulter Optima-90, with a fixed angle 90-Ti rotor). The glassy rough ribosome pellets were  
132 dissolved overnight in S30 buffer B (5 mM Tris-HCl, pH 8.2, 60 mM potassium glutamate, 14 mM  
133 magnesium glutamate, 2 mM DTT) at 4 °C. The ribosomal RNA (rRNA) was isolated from the ribosomes  
134 through standard phenol chloroform extraction using phenol:chloroform:isoamyl alcohol (PCI,  
135 49.5:49.5:1). The final rRNA concentration was determined using the NanoDrop One<sup>C</sup>, where 1 OD<sub>600</sub> =  
136 40 µg mL<sup>-1</sup> RNA and stored at -80 °C.

137

#### 138 **RNA-Alexa647 labelling**

139 The '3-end of the rRNA was labelled with AlexaFluor647-hydrazide using a periodate oxidation reaction  
140 (40-42). In short, to 80 µL of rRNA (3.4 mg mL<sup>-1</sup>), 7 µL of nuclease free water, 3.33 µL of 3 M sodium  
141 acetate (pH 5.2), and 10 µL of 25 mM sodium periodate (freshly prepared in water on the day) was added.  
142 The mixture was incubated on ice for 50 minutes. Subsequently, 20 µL of 3 M sodium acetate (pH 5.2) and  
143 80 µL nuclease free water was added. The activated RNA was then precipitated by addition of 400 µL  
144 isopropanol through cooling it on ice for at least one hour. The RNA was then spun down (14,000 g at 4 °C  
145 for 15 minutes). The supernatant was removed and 150 µL of ice-cold ethanol was added to the pellet

146 without mixing. After another centrifugation step, and removal of the supernatant, the RNA was mixed into  
147 the reaction buffer (100 mM sodium acetate, pH 5.2, 25 nmol Alexa-647 hydrazide). The reaction was left  
148 over 48 hours, after which the labelled RNA was isolated through a isopropanol and ethanol precipitation.  
149 The rRNA-A647 was then redissolved in 80  $\mu$ L of nuclease free water. The concentration was determined  
150 using the NanoDrop One<sup>C</sup>.

151

### 152 **Preparation of NPM1-rRNA condensates**

153 NPM1-AlexaFluor488 (NPM1-A488) stock solutions were prepared at 200  $\mu$ M with 1:9 molar ratio  
154 AlexaFluor488 labelled NPM1 to unlabelled NPM1 in 10 mM Tris-HCl (pH 7.5), 300 mM NaCl. NPM1-  
155 A488 aliquots of 20  $\mu$ L were snap frozen and stored at -80 °C.

156 The order of components for a typical experiment consists of first mixing the PEG (10 kDa, from  
157 a 35 wt% stock), with the buffer (from a 4x stock of 40 mM Tris-HCl (pH 7.5), 600 mM NaCl) and then  
158 diluted to the required final volume, often 30  $\mu$ L at room temperature. 15 minutes prior to measuring the  
159 NPM1-A488 and rRNA were added to the premixed diluted buffer.

160

### 161 **Quantification of the dilute phase**

162 A typical sample of 30  $\mu$ L was prepared in 10 mM Tris (pH 7.5), 150 mM NaCl with varying concentrations  
163 of PEG, NPM1/NPM1-A488 (1:9 molar ratio labelled), and rRNA-A647 (only labelled) as described above.  
164 After incubating for 15-20 minutes at room temperature, the condensed phase was separated from the dilute  
165 phase by centrifugation at 21,000 g for 20 minutes at room temperature. The dilute phase was then  
166 transferred to a 384-well plate (Nunc, flat bottom) and the fluorescence intensity was measured on a plate  
167 reader (Tecan Spark M10) at 485/535 nm for NPM1-A488, and 620/680 nm for rRNA-A647.  
168 Concentrations of the dilute phase were calculated based on calibration curves (Fig. S1).

169

### 170 **Preparation of modified glass coverslips**

171 Ibidi 18-well chambered slides (#1.5) were first cleaned using oxygen plasma and directly afterwards  
172 incubated in a 0.01 mg/mL solution of PLL(2)-g[3,5]-PEG(2) (SuSoS AG, Switzerland) in 10 mM HEPES  
173 buffer (pH 7.4) for at least 1 hour at room temperature. Ibidi chambers were rinsed several times with  
174 MilliQ water and dried with pressurised air. Modified glass slides were stored at -20 °C.

175

### 176 **Quantification of the condensed phase by confocal microscopy**

177 Images for partitioning were acquired on a Leica Sp8x confocal inverted microscope (Leica Microsystems,  
178 Germany) equipped with a DMi8 CS motorized stage, a pulsed white light laser, and 2 x HyD SP GaAsP  
179 and 2x PMT detectors. Images were recorded using the LAS X v.3.5 acquisition software, using a HC PL  
180 APO 100x/1.40 oil immersion objective.

181 Samples were prepared as described above. After incubation of NPM1-rRNA condensates for 15  
182 minutes, the sample was transferred to the modified Ibidi-18 well chambers and the condensates were  
183 allowed to settle to the bottom of the chamber for 10 minutes. Partitioning coefficients were analysed by  
184 MATLAB, the background was subtracted by measuring non-fluorescent condensates at the same settings  
185 as for the fluorescent images. The partitioning coefficient was then calculated using:  $K_p = (I_{condensate} -$   
186  $I_{background}) / (I_{dilute} - I_{background})$  where  $I_{condensate}$  is the average intensity of all condensates in one frame and  $I_{dilute}$   
187 the average intensity of the area without condensates. Standard deviations were determined of at least three  
188 sets of  $K_p$  values derived from three different images.

189

## 190 **FRAP analysis**

191 For FRAP analysis time lapse videos were recorded at room temperature on a CSU X-1 Yokogawa spinning  
192 disc confocal unit connected an Olympus IX81 inverted microscope, using a x100 piezo-driven oil  
193 immersion objective (NA 1.3) and a 488, 561 or 640 nm laser beams. Emission was measured with a 200  
194 ms exposure time at a rate of 120 frames per minute, using an Andor iXon3 EM-CCD camera. The acquired  
195 images have a pixel size of 141 nm and a field of  $72 \times 72 \mu\text{m}^2$ . For bleaching, a small region of interest (ROI)  
196 was selected in the middle of a condensed droplet. The 488 nm or 640 nm laser line was set to at 100%  
197 laser power using 75 pulses of 200  $\mu\text{s}$ . The recovery was then imaged at reduced laser intensity with a time  
198 interval of 500 ms.

199 Recovery profiles were analysed using ImageJ, the normalized intensities were fitted to a 2D-diffusion  
200 with a fixed boundary (43). Using the resulted exponential decay equation  $I_{normalized} = A(I - e^{-bt}) + C$ , from  
201 which we obtained the parameters  $A$ ,  $b$  and  $C$ . The recovery half-life was then determined at  $t_{1/2} = \ln(2)/b$ .

202

## 203 **RESULTS AND DISCUSSION**

### 204 **PEG shifts the phase diagram of NPM1-rRNA**

205 Inspired by the numerous membraneless organelles that contain both proteins and RNA, we chose a  
206 heterotypic system consisting of nucleophosmin (NPM1) and ribosomal RNA (rRNA) as model  
207 condensate. This system is illustrated in Fig. 1A, and forms liquid droplets under ‘physiological’ conditions  
208 (here defined as physiological salt by 10 mM Tris, 150 mM NaCl), even without crowding. By labelling  
209 both NPM1 and rRNA with fluorophores we could observe that indeed the rRNA co-localizes into the dense  
210 NPM1 droplets (Fig. 1B), in agreement with our previous study (40). We found a maximum degree of  
211 phase separation, as inferred from microscopy analysis, at a NPM1:rRNA ratio of 20  $\mu\text{M}$  NPM1 : 150 ng  
212  $\mu\text{L}^{-1}$  rRNA (19,40). This corresponds roughly to one pentamer NPM1 interacting with 110 nucleotides of  
213 rRNA. When keeping this ratio constant, we could decrease the protein concentration to a lower limit of 10  
214  $\mu\text{M}$  and still observe liquid condensates (Fig.1C, S2).

215 When we added polyethylene glycol (PEG), a commonly used crowding agent, to the mixtures of  
 216 NPM1 and rRNA, we observed phase separation at lower NPM1 concentrations. For 2 wt% PEG, we could  
 217 observe phase separation for concentrations down to 2.5  $\mu\text{M}$  NPM1 and 19  $\text{ng } \mu\text{L}^{-1}$  rRNA (Fig. 1C, S2),  
 218 which suggests that PEG enhances the association between protein and RNA. Moreover, we found that at  
 219 2 wt% PEG, NPM1 could also phase separate without RNA at 10  $\mu\text{M}$  protein concentrations and higher  
 220 into apparently homotypic droplets (Fig. 1C, S3). These findings are in agreement with a previous study of  
 221 Kriwacki and co-workers, who showed that no second component, such as arginine-rich peptides or rRNA,  
 222 is needed for phase separation of NPM1 under PEG-based crowding conditions (29,30). These findings  
 223 suggest that crowding by PEG not only enhances associative interactions between NPM1 and rRNA, but it  
 224 enhances the self-interactions of NPM1 even more. Assuming that volume exclusion by the crowding  
 225 agents is responsible for enhancing the intermolecular interactions, the observed effects could be explained  
 226 by the structural differences between NPM1 and rRNA: the protein NPM1 has a more globular shape and  
 227 a larger effective radius than the polymeric rRNA and will therefore experience stronger volume exclusion  
 228 due to crowders. Crowding by PEG will thus likely affect the concentrations of NPM1 and rRNA in both  
 229 the dilute and the dense (condensate) phase in a non-trivial way. Therefore, we next sought to quantify the  
 230 NPM1-rRNA phase diagram under crowding conditions.

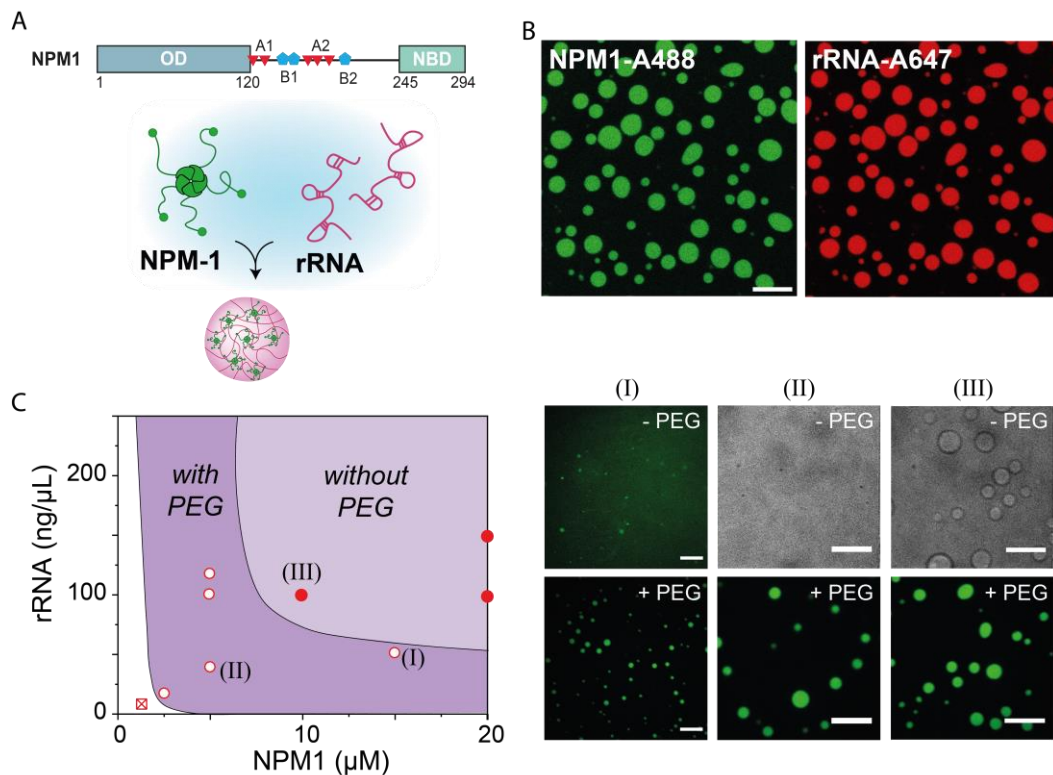

231

232 **Figure 1: PEG induced phase separation of NPM1-rRNA.** (A) Schematic illustration of nucleophosmin (NPM1)  
 233 protein domains and the formation of condensates with rRNA. NPM1 encodes for a structural N-terminal  
 234 oligomerization domain (OD) and a C-terminal nuclear binding domain (NBD) linked by an intrinsically disordered  
 235 region with two acidic tracts (A1 and A2) and two weak basic tracts (B2 and B2). Pentamers of NPM1 phase separate  
 236 with rRNA into condensates in vitro. (B) Fluorescent microscopy images of NPM1-rRNA condensates at 10  $\mu\text{M}$   
 237 NPM1-Alexa488; 150  $\text{ng } \mu\text{L}^{-1}$  rRNA-Alexa647 (in 10 mM Tris pH 7.5, 150 mM NaCl). Scale bar, 10  $\mu\text{m}$ . (C)  
 238 Schematic representation of the shift in phase diagram of NPM1-rRNA liquid-liquid phase separation, and three  
 239 conditions in the presence or absence of 2 wt% PEG: (I) 15  $\mu\text{M}$  NPM1, 50  $\text{ng } \mu\text{L}^{-1}$  rRNA, (II) 5  $\mu\text{M}$  NPM1, 37.5  $\text{ng}$   
 240  $\mu\text{L}^{-1}$  rRNA, (III) 10  $\mu\text{M}$  NPM1, 75  $\text{ng } \mu\text{L}^{-1}$  rRNA. Scale bars, 10  $\mu\text{m}$ .

## 241 PEG reduces only NPM1 concentrations in the dilute phase

242 Excluded volume theory predicts that crowding enhances the effective attractions between macromolecules  
243 by increasing the entropy of the crowders upon complexation of the macromolecules. For our phase  
244 separating system, enhanced attraction could result in phase separation at lower concentrations, as  
245 suggested by the measurements in Figure 1C. To obtain a quantitative understanding of the effect of  
246 crowding on phase separation between NPM1 and rRNA, and how this affects their concentrations in the  
247 dilute and condensed phase, we determined the compositions of the droplets and supernatant as function of  
248 the amount of crowding agent PEG.

249 First, we examined the concentrations of NPM1 and rRNA in the dilute phase. The condensates were  
250 separated from the dilute phase by centrifugation (Fig. S4). We quantified the concentration of NPM1 and  
251 rRNA in the dilute phase for three different overall mixing ratios. In all cases, the addition of PEG reduced  
252 the concentration of NPM1 in the dilute phase, while the rRNA remained approximately constant or even  
253 increased (Fig. 2A). It is clear that this is not the expected behavior for a classical crowding agent that  
254 enhances the attraction between NPM1 and rRNA. In that case, the saturation concentration of both NPM1  
255 and rRNA should decrease with increased crowding, although the relative degree of decrease might depend  
256 on the overall mixing ratio. Instead, we found that the rRNA saturation concentration remained constant  
257 for all mixing ratios. Crowding thus seems to leave the interaction between NPM1 and rRNA unchanged,  
258 while it enhances the interactions of NPM1 with itself, as the saturation concentration of NPM1 decreased  
259 significantly. Our results regarding the NPM1 concentrations in the dilute phase corroborate what has  
260 previously been observed for homotypic NPM1 condensation (29): crowding decreased the solubility of  
261 NPM1. However, it was also observed that the ratio between the arginine-rich SURF6 peptide (S6N) and  
262 NPM1 remained constant with increasing crowding concentrations, probably because the short peptide  
263 partitions as a client into the homotypic NPM1 droplets.

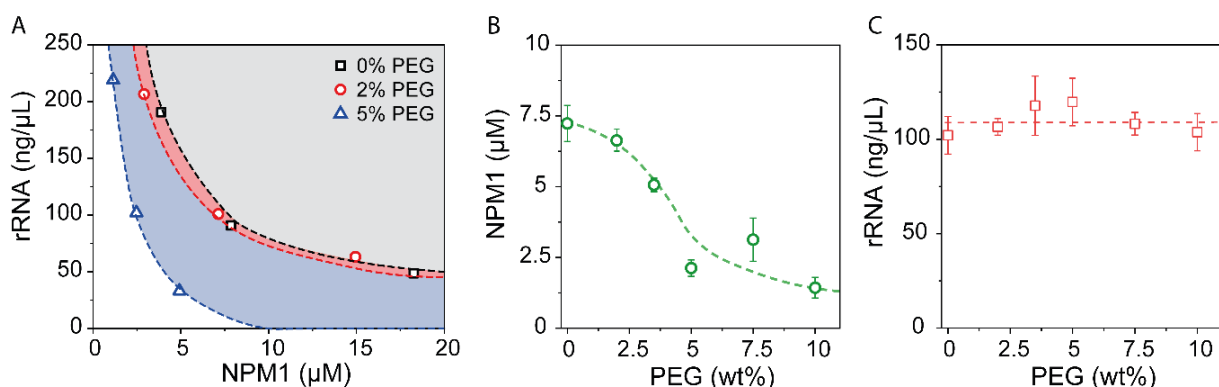

264

265 **Figure 2: PEG reduces NPM1 concentration and not the rRNA concentrations in the dilute phase.** (A)  
266 Concentrations of NPM1 plotted against rRNA in the dilute phase for three fixed NPM1:rRNA ratios: 5:150, 10:100,  
267 20:50 (μM NPM1: ng μL<sup>-1</sup> rRNA), at three different PEG concentrations. (B-C) Addition of PEG to 10 μM NPM1,  
268 100 ng μL<sup>-1</sup> rRNA reduces the concentration of NPM1 in the dilute phase (B) but not for rRNA (C). The errors in  
269 these figures are standard deviations from triplicate measurements, and the dashed lines are present to guide the eye.



270 To analyze the effect of PEG in more detail, we focussed on one ratio of NPM1:rRNA (10  $\mu\text{M}$  NPM1  
 271 with 100 ng  $\mu\text{L}^{-1}$  rRNA), and looked at several concentrations of PEG (Fig. 2B and C). The dilute phase  
 272 NPM1 concentration gradually decreased from 7.5  $\mu\text{M}$  without crowding to 2.5  $\mu\text{M}$  NPM1 at 10 wt% PEG  
 273 (Fig. 2B). We did not observe a plateau at high crowding, despite the fact that the condensates had turned  
 274 into gel-like structures with very little relaxation already at 2 wt% PEG (see also section: Crowding reduces  
 275 condensate fluidity), but rather a gradual decrease that becomes asymptotic towards zero, in agreement with  
 276 simple theoretical predictions for crowding-induced phase separation. For rRNA, we observed no clear  
 277 change in the concentration in the dilute phase, as was found for other mixing ratios as well: it remained  
 278 constant around 100 ng  $\mu\text{L}^{-1}$  (Fig. 2C).

279

### 280 PEG partitions into NPM1-rRNA condensates and increase local concentrations

281 We next analyzed how crowding affects the composition of condensates by studying the condensed phase  
 282 in more detail. The tiny combined volume of the condensate droplets ( $< 0.1 \mu\text{L}$ ) made an equivalent analysis  
 283 of the absolute concentrations by fluorescence spectroscopy impossible. We therefore analyzed the relative  
 284 changes in the composition of the condensates using fluorescence microscopy (Fig. 3A), despite the  
 285 intrinsic limitations of quantitative fluorescence at high concentrations (44,45). Here, we used labelled  
 286 NPM1 and rRNA at low enough concentrations that the fluorophores are further apart than their typical  
 287 homo-FRET distance (46).

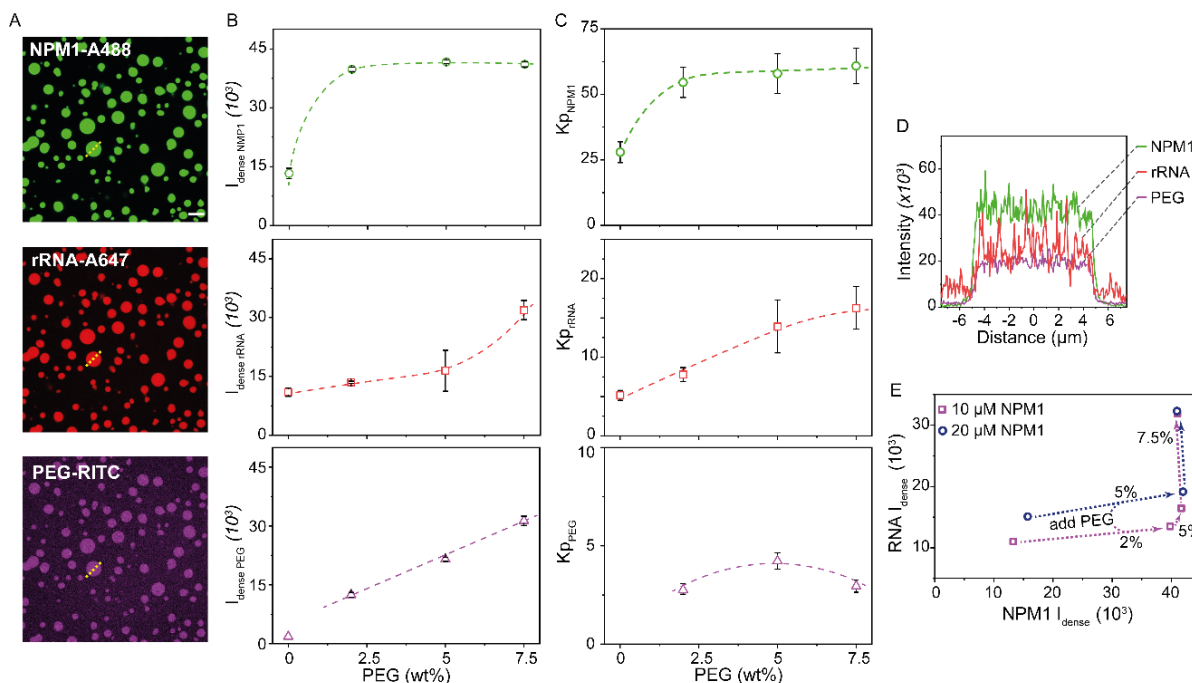

288

289 **Figure 3: Confocal microscopy analysis of NPM1-rRNA condensates under crowded conditions.** (A)  
 290 Fluorescence images of NPM1-Alexa488, rRNA-Alexa647, and PEG-rhodamine, indicating PEG co-localizes into  
 291 the condensed phase (20  $\mu\text{M}$  NPM1, 150 ng  $\mu\text{L}^{-1}$  rRNA, 5 wt% PEG). Scale bar, 10  $\mu\text{m}$ . (B-C) Average fluorescence  
 292 intensities (B) and partitioning coefficients ( $K_p$ ) (C) of NPM1, rRNA, and PEG plotted against the concentrations of  
 293 PEG. (D) Intensities profile across one single condensate (dashed line in A). (E) Graph representing the influence of  
 294 crowding on the intensities (and therefore concentration) of NPM1 and rRNA within condensates. The errors in this  
 295 figure are standard deviations from triplicate measurements, and all dotted lines and arrows are to guide the eye.

296 Confocal microscopy images show a three-fold increase in fluorescence intensity of NPM1 (Fig. 3B)  
297 upon addition of 2 wt% PEG. The partitioning coefficient ( $K_p$ ) was determined based on this fluorescence,  
298 and as a consequence the  $K_p$  for NPM1 (Fig. 3C) is showing the same trend. Further increasing the  
299 concentration of PEG did not lead to additional increase in NPM1 fluorescence, and most likely in  
300 concentration. An increase in NPM1 concentration upon crowding is expected if the crowders enhance the  
301 association between NPM1 proteins, although the magnitude of the observed increase is higher than  
302 expected for a crowder at approximately 5 vol% (47). Moreover, in the case of pure excluded volume  
303 interactions between crowder and the phase separating biomolecules, the local concentration of  
304 biomolecules inside the condensates and thereby their density is expected to continue increasing when the  
305 crowder concentration is increased further, since increasing the crowder concentration leads to further  
306 enhancement of the association strength between the biomolecules, which translates into a higher binodal  
307 condensate concentration. The fact that we do not observe a further increase in density of the NPM1  
308 concentration inside the condensates suggests that the interactions between NPM1 and PEG may not be  
309 limited to volume exclusion.

310 For rRNA, we found that addition of PEG did not affect the concentration in the dilute phase. In  
311 general, rRNA showed a much lower partitioning into the condensates ( $K_p = 5$ ) than NPM1 in the absence  
312 of PEG, and the rRNA concentration increased only slightly upon addition of PEG (Fig. 3B). At low (0-5  
313 wt%) PEG concentration, the rRNA concentration increased about 25%, whereas the local NPM1  
314 concentration increased threefold. However, at the highest PEG concentration (7.5 wt%), the rRNA  
315 concentration and partitioning increased about twofold, while the NPM1 concentration did not increase  
316 further at this PEG concentration (Fig. 3E), and also the rRNA concentration in the dilute phase did not  
317 change. The slight increase in rRNA in the condensed phase at low PEG concentrations is in agreement  
318 with our observation that the dilute phase concentration did not increase: PEG mostly enhances NPM1 self-  
319 interaction, which causes the condensed phase to become denser, but the interaction between NPM1 and  
320 rRNA is not strongly affected. Moreover, PEG is known to enhance folding of RNA into more compact  
321 states (48,49), which could explain the higher concentration of rRNA inside the condensates. The strong  
322 increase in rRNA concentration at the highest PEG concentration suggests that the condensates may no  
323 longer be pure liquids governed by LLPS at that point, but that they are kinetically trapped in a gel state, as  
324 we will discuss further below.

325 Finally, we also looked at the distribution of the crowding agent PEG over the two phases (Fig. 3). In  
326 the case of ideal excluded volume interactions linked to a first-order phase transition of a solute that is  
327 driven by a crowding-enhanced association, and ignoring the contribution of the crowders to the osmotic  
328 pressure, the concentration of crowders in the dilute and condensed phase is predicted to be the same. More  
329 generally, the high local concentration of biomolecules in the condensates exclude volume for the crowder  
330 molecules, and therefore, we expect that crowders are weakly depleted from the condensates. However,  
331 when we measured the distribution of PEG over both phases via fluorescence microscopy, we found that  
332 PEG was enriched in the condensed phase by a factor of 3 (Fig. 3B-C). To minimize the effect of the dye,

333 less than 0.1% of the PEG was labelled in this study. Interestingly, the enrichment was independent of  
334 crowding concentration, and suggests that PEG exhibits associative interactions with NPM1 or rRNA or  
335 both. Therefore, the classical picture of PEG as an inert crowding agent that interacts via excluded volume  
336 interactions with biomolecules is not accurate. Instead, PEG seems to co-condense with NPM1 and/or  
337 rRNA in a form of ternary associative phase separation.

338 Partitioning of crowding agents was also observed by a few other groups. Hammer and co-workers  
339 observed similar partitioning of their small molecular weight dextran (4.4 kDa) in condensates made of the  
340 LAF1 RGG domain as in our PEG-based crowding studies (38). Moreover, they observed decreasing  
341 partitioning of dextran when its size was increased. In a systematic study on coacervates made of spermine  
342 and polyuridylic acid (polyU), Keating and co-workers observed a similar effect of PEG (8 kDa) and Ficoll  
343 (70 kDa) as crowding agents on the induction of phase separation. In contrast to our study, they observed  
344 a weak exclusion of PEG, even though its size was similar, but an enrichment of Ficoll into spermine-polyU  
345 coacervates (50). Their results indicated that for spermine-polyU coacervates, PEG behaves more like an  
346 inert crowder. However, in both cases (crowding agent exclusion and inclusion) a promotion of phase  
347 separation was observed, which they contributed to an enhancement of the favourable base-stacking of  
348 polyU. If the exclusion of PEG by polyU-based coacervates is taken as an indication that there is no specific  
349 association between PEG and RNA in the condensed phase, we can infer that in our system of NPM1-  
350 rRNA, PEG is mostly associated with the NPM1. This suggests that PEG-induced phase separation of  
351 homotypic NPM1 droplets is likely driven by a co-condensation of PEG and NPM1 (Fig. S3). The same  
352 may be the case for a significant number of other homo- and heterotypic IDP-based condensates that have  
353 been reported in the presence of PEG (4), for example a recent preprint by Knowles and co-workers  
354 indicated PEG interacts with FUS-protein condensates (51).

355 Finally, our results show that the ratio between NPM1 and rRNA in condensates is altered upon  
356 increasing PEG concentration, in contrast to the NPM1-S6N condensates by Kriwacki and co-workers,  
357 which rely on electrostatic interactions (29). Our results indicate that the co-condensation with PEG, driven  
358 by weak associations between the PEG and NPM1, is responsible for altering the condensate composition,  
359 and increasing the overall macromolecular concentration within the condensed phase. By extension, a  
360 similar mechanism may play a role in the crowded environment in the cell: besides excluded volume  
361 interactions, there may be many (weak) soft repulsive or attractive forces (3,52) between all the crowders  
362 and phase separating IDRs, which could result in promotion of phase separation through co-condensation  
363 or segregation (53). This might also lead to changes in the material properties of condensates formed in the  
364 presence of crowding agents, as we investigated next.

365

### 366 **Crowding reduces condensate fluidity**

367 Liquid-liquid phase separation is characterized by the formation of liquid droplets that typically exhibit  
368 rapid recovery of fluorescence after photobleaching (FRAP). Indeed, our model system shows full and fast

369 recovery after photobleaching in the absence of PEG (Fig. 4). The mobile fraction correlates to the recovery  
370 percentage, and for NPM1 in buffer this is almost 90%, and for rRNA around 65% (Fig. 4D). This indicates  
371 that NPM1 shows almost a full recovery, since the total recovery was not corrected for the size of bleached  
372 area. From the recovery curves we were able to determine the recovery half-time ( $t_{1/2}$ ), which was for both  
373 NPM1 and rRNA approximately 10 seconds. Thus, although NPM1 and rRNA have similar characteristic  
374 recovery times, a larger fraction of the rRNA in condensates was immobile compared the NPM1. We  
375 attribute this to possible RNA-RNA interactions (40).

376 The addition of PEG reduced the mobile fraction of both NPM1 and rRNA in the condensed phase  
377 (Fig. 3) significantly: 2% PEG decreased the mobile fraction of both NPM1 and rRNA to 50%, while the  
378 recovery half-time increased to 25 seconds and 40 seconds respectively. When we increased the PEG  
379 concentration further to 5%, both NPM1 and rRNA became completely immobile, indicating that the  
380 condensates are no longer liquid droplets governed by LLPS, but have turned into gels.

381 The solidifying effect of PEG on both NPM1 and rRNA is interesting compared to our previous results.  
382 For instance, our lab showed that physiological concentrations of  $Mg^{2+}$  was only affecting the rRNA  
383 diffusion in NPM1-rRNA condensates (40) by enhancing interactions between the rRNA molecules.  
384 Kriwacki and co-workers demonstrated that the addition of the arginine rich domain SURF6 could liquefy  
385 homotypic NPM1-NPM1 condensates (29). These newly formed NPM1-SURF6 condensates depend on  
386 oppositely electrostatic interactions, while NPM1-rRNA condensation is considered to rely on the RNA  
387 recognition motifs (RRMs) present in NPM1.

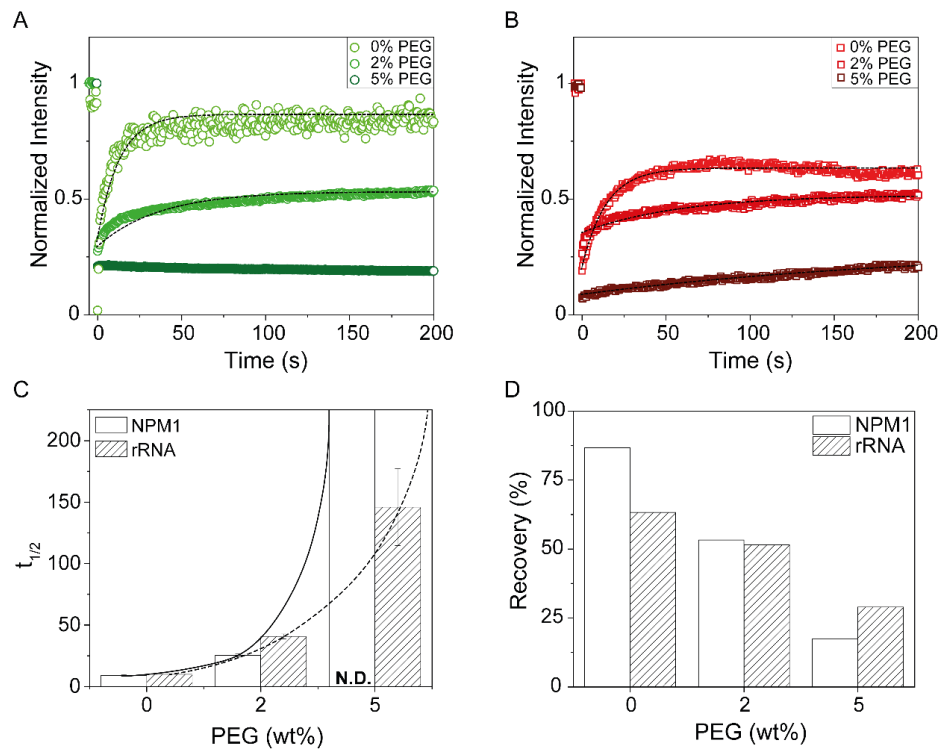

388

389 **Figure 4: PEG changes the viscoelastic properties of NPM1 and rRNA.** (A-B) FRAP recovery curves of NPM1  
390 (A), and rRNA (B) upon increasing PEG crowding. The dashed lines represent the model fit for which the  $t_{1/2}$   
391 and total recovery were determined. (C) Calculated half-life ( $t_{1/2}$ ) of NPM1 and rRNA at different concentrations of PEG.  
392 The lines are there to guide the eye. (D) Mobile fraction from the total recovery determined from the FRAP curves.

393 Taking into account that PEG is present within the condensed phase (Fig. 3) we hypothesize that co-  
394 condensation of PEG is solidifying NPM1-rRNA droplets *in vitro*. Since PEG is not fulfilling the classical  
395 crowding model of an inert macromolecule, we observe that PEG likely binds to NPM1 without affecting  
396 the ability of NPM1 to bind rRNA via the RRM. The co-condensation of PEG and NPM1 strongly  
397 increases the NPM1 content, but also reduces their diffusion. The rRNA remains condensed with the NPM1  
398 via binding to the RRM, but its concentration is not increased as much as NPM1 due to weakly  
399 unfavourable interactions with the PEG, as also suggested by the work of Keating and co-workers (50).  
400 Nevertheless, the higher local concentration of NPM1 also decreases the diffusivity of rRNA, as it is more  
401 likely to be bound by multiple RRM of NPM1. Above a threshold PEG concentration, the local interactions  
402 between NPM1-NPM1 and NPM1-PEG become too strong and their mobility decreases sharply, which is  
403 reflected by the absence of NPM1 recovery in Fig. 4C.

404

## 405 CONCLUSIONS

406 In conclusion, we reported that the crowding agent PEG could induce and enhance phase separation of a  
407 model biomolecular condensate consisting of NPM1-rRNA. By quantifying the compositions of both the  
408 condensed and dilute phase, we could deduce that only the protein component NPM1 is depleted from the  
409 dilute phase and enriched in the condensed phase. Although the concentration of rRNA remained constant  
410 in the dilute phase, the condensed phase showed a slight PEG-dependent enrichment, possibly due to a  
411 more condensed state of the dense phase. Through fluorescent labelling of the crowding agent, we found  
412 that, surprisingly, PEG is also enriched in the condensed phase, suggesting that it enhances phase separation  
413 by co-condensing with NPM1 rather than through excluded volume interactions. These results also indicate  
414 that partitioning of “crowding agents” can change condensate compositions and material properties, and  
415 that even crowders that are widely believed to be inert can have significant interactions with biomolecules  
416 that undergo liquid-liquid phase separation. This is relevant to the crowded environment of the cell as well:  
417 it is very likely that an important fraction of the macromolecules present in the cell exhibit weak repulsive  
418 or attractive interactions with the components of membraneless organelles, which results in altered  
419 composition and material properties compared to their *in vitro* reconstituted analogues. Finally, our results  
420 also put *in vitro* condensates formed in the presence of common crowding agents in a new perspective and  
421 suggest that addition of common crowding agents could affect *in vitro* phase separation systems and  
422 therefore should be selected with care.

## 423 AUTHOR INFORMATION

### 424 Author Contributions

425 Alain A.M. André: conceptualization, methodology, investigation, writing. N. Amy Yewdall:  
426 methodology. Evan Spruijt: conceptualization, software, writing, supervision funding acquisition.

### 427 Declaration of interests

428 The authors declare no competing financial interest.

429

## 430 ACKNOWLEDGEMENTS

431 The authors thank Prof. Richard Kriwacki (St. Jude Children's Research Hospital) for providing us with  
432 the NPM1-GFP plasmid, Aafke Jonker and Frank Nelissen (Radboud University) for providing protocols  
433 to isolate ribosomes and labelling RNA, Merlijn van Haren (Radboud University) for providing a  
434 MATLAB script to determine partitioning coefficients of the microscopy data and Dr. Ioannis Alexopoulos  
435 (Radboud University, now Justus Liebig University) for his guidance in confocal microscopy. We would  
436 like to thank Prof. Wilhelm Huck (Radboud University) and Prof. Allen Minton (NIH) for fruitful  
437 discussions. This work was financially supported by the Netherlands Organization for Scientific Research  
438 (NWO).

439

## 440 REFERENCES

- 441 1. Fulton, A. B. 1982. How crowded is the cytoplasm? *Cell*. 30(2):345-347, doi: 10.1016/0092-8674(82)90231-8.
- 442 2. Zimmerman, S. B., and S. O. Trach. 1991. Estimation of macromolecule concentrations and excluded volume  
443 effects for the cytoplasm of Escherichia coli. *J Mol Biol*. 222(3):599-620, doi: 10.1016/0022-2836(91)90499-v,  
444 <https://www.ncbi.nlm.nih.gov/pubmed/1748995>.
- 445 3. Rivas, G., and A. P. Minton. 2016. Macromolecular crowding in vitro, in vivo, and in between. *Trends*  
446 *Biochem Sci*. 41(11):970-981, doi: 10.1016/j.tibs.2016.08.013,  
447 <https://www.ncbi.nlm.nih.gov/pubmed/27669651>.
- 448 4. Andre, A. A. M., and E. Spruijt. 2020. Liquid-liquid phase separation in crowded environments. *Int J Mol Sci*.  
449 21(16), doi: 10.3390/ijms21165908, <https://www.ncbi.nlm.nih.gov/pubmed/32824618>.
- 450 5. Shin, Y., and C. P. Brangwynne. 2017. Liquid phase condensation in cell physiology and disease. *Science*.  
451 357(6357):eaaf4382, doi: 10.1126/science.aaf4382,  
452 <https://science.sciencemag.org/content/sci/357/6357/eaaf4382.full.pdf>.
- 453 6. Guo, Y. E., J. C. Manteiga, J. E. Henninger, B. R. Sabari, A. Dall'Agnese, N. M. Hannett, J.-H. Spille, L. K.  
454 Afeyan, A. V. Zamudio, K. Shrinivas, B. J. Abraham, A. Boija, T.-M. Decker, J. K. Rimel, C. B. Fant, T. I.  
455 Lee, I. I. Cisse, P. A. Sharp, D. J. Taatjes, and R. A. Young. 2019. Pol II phosphorylation regulates a switch  
456 between transcriptional and splicing condensates. *Nature*. doi: 10.1038/s41586-019-1464-0.
- 457 7. Ladouceur, A. M., B. S. Parmar, S. Biedzinski, J. Wall, S. G. Tope, D. Cohn, A. Kim, N. Soubry, R. Reyes-  
458 Lamothe, and S. C. Weber. 2020. Clusters of bacterial RNA polymerase are biomolecular condensates that  
459 assemble through liquid-liquid phase separation. *Proc Natl Acad Sci U S A*. doi: 10.1073/pnas.2005019117,  
460 <https://www.ncbi.nlm.nih.gov/pubmed/32675239>.
- 461 8. Yamazaki, T., S. Souquere, T. Chujo, S. Kobelke, Y. S. Chong, A. H. Fox, C. S. Bond, S. Nakagawa, G.  
462 Pierron, and T. Hirose. 2018. Functional domains of NEAT1 architectural lncRNA induce paraspeckle  
463 assembly through phase separation. *Mol Cell*. 70(6):1038-1053 e1037, doi: 10.1016/j.molcel.2018.05.019,  
464 <https://www.ncbi.nlm.nih.gov/pubmed/29932899>.
- 465 9. Li, P., S. Banjade, H. C. Cheng, S. Kim, B. Chen, L. Guo, M. Llaguno, J. V. Hollingsworth, D. S. King, S. F.  
466 Banani, P. S. Russo, Q. X. Jiang, B. T. Nixon, and M. K. Rosen. 2012. Phase transitions in the assembly of

- 467 multivalent signalling proteins. *Nature*. 483(7389):336-340, doi: 10.1038/nature10879,  
468 <https://www.ncbi.nlm.nih.gov/pubmed/22398450>.
- 469 10. Banjade, S., Q. Wu, A. Mittal, W. B. Peeples, R. V. Pappu, and M. K. Rosen. 2015. Conserved interdomain  
470 linker promotes phase separation of the multivalent adaptor protein Nck. *Proc Natl Acad Sci U S A*.  
471 112(47):E6426-6435, doi: 10.1073/pnas.1508778112, <https://www.ncbi.nlm.nih.gov/pubmed/26553976>.
- 472 11. Banani, S. F., H. O. Lee, A. A. Hyman, and M. K. Rosen. 2017. Biomolecular condensates: organizers of  
473 cellular biochemistry. *Nat Rev Mol Cell Biol*. 18(5):285-298, doi: 10.1038/nrm.2017.7,  
474 <https://www.ncbi.nlm.nih.gov/pubmed/28225081>.
- 475 12. Li, P., S. Banjade, H.-C. Cheng, S. Kim, B. Chen, L. Guo, M. Llaguno, J. V. Hollingsworth, D. S. King, S. F.  
476 Banani, P. S. Russo, Q.-X. Jiang, B. T. Nixon, and M. K. Rosen. 2012. Phase transitions in the assembly of  
477 multivalent signalling proteins. *Nature*. 483(7389):336-340, doi: 10.1038/nature10879,  
478 <https://doi.org/10.1038/nature10879>.
- 479 13. Riback, J. A., L. Zhu, M. C. Ferrolino, M. Tolbert, D. M. Mitrea, D. W. Sanders, M.-T. Wei, R. W. Kriwacki,  
480 and C. P. Brangwynne. 2019. Composition dependent phase separation underlies directional flux through the  
481 nucleolus. *BioRxiv*.(809210), doi: 10.1101/809210.
- 482 14. Brangwynne, C. P., C. R. Eckmann, D. S. Courson, A. Rybarska, C. Hoege, J. Gharakhani, F. Jülicher, and A.  
483 A. Hyman. 2009. Germline P granules are liquid droplets that localize by controlled dissolution/condensation.  
484 *Science*. 324(5935):1729, doi: 10.1126/science.1172046,  
485 <http://science.sciencemag.org/content/324/5935/1729.abstract>.
- 486 15. Protter, D. S. W., B. S. Rao, B. Van Treeck, Y. Lin, L. Mizoue, M. K. Rosen, and R. Parker. 2018. Intrinsically  
487 disordered regions can contribute promiscuous interactions to RNP granule assembly. *Cell Rep*. 22(6):1401-  
488 1412, doi: 10.1016/j.celrep.2018.01.036, <https://www.ncbi.nlm.nih.gov/pubmed/29425497>.
- 489 16. Martin, E. W., A. S. Holehouse, I. Peran, M. Farag, J. J. Incicco, A. Bremer, C. R. Grace, A. Soranno, R. V.  
490 Pappu, and T. Mittag. 2020. Valence and patterning of aromatic residues determine the phase behavior of  
491 prion-like domains. *Science*. 367(6478):694-699, doi: 10.1126/science.aaw8653,  
492 <https://www.ncbi.nlm.nih.gov/pubmed/32029630>.
- 493 17. Brady, J. P., P. J. Farber, A. Sekhar, Y. H. Lin, R. Huang, A. Bah, T. J. Nott, H. S. Chan, A. J. Baldwin, J. D.  
494 Forman-Kay, and L. E. Kay. 2017. Structural and hydrodynamic properties of an intrinsically disordered  
495 region of a germ cell-specific protein on phase separation. *Proc Natl Acad Sci U S A*. 114(39):E8194-E8203,  
496 doi: 10.1073/pnas.1706197114, <https://www.ncbi.nlm.nih.gov/pubmed/28894006>.
- 497 18. Gomes, E., and J. Shorter. 2019. The molecular language of membraneless organelles. *J Biol Chem*.  
498 294(18):7115-7127, doi: 10.1074/jbc.TM118.001192, <https://doi.org/10.1074/jbc.TM118.001192>.
- 499 19. Feric, M., N. Vaidya, T. S. Harmon, D. M. Mitrea, L. Zhu, T. M. Richardson, R. W. Kriwacki, R. V. Pappu,  
500 and C. P. Brangwynne. 2016. Coexisting liquid phases underlie nucleolar subcompartments. *Cell*. 165(7):1686-  
501 1697, doi: 10.1016/j.cell.2016.04.047, <https://www.ncbi.nlm.nih.gov/pubmed/27212236>.
- 502 20. Mitrea, D. M., and R. W. Kriwacki. 2016. Phase separation in biology; functional organization of a higher  
503 order. *Cell Commun Signal*. 14:1, doi: 10.1186/s12964-015-0125-7,  
504 <https://www.ncbi.nlm.nih.gov/pubmed/26727894>.
- 505 21. Yewdall, N. A., A. A. M. André, T. Lu, and E. Spruijt. 2021. Coacervates as models of membraneless  
506 organelles. *Curr Opin Colloid Interface Sci*. 52:101416, doi: <https://doi.org/10.1016/j.cocis.2020.101416>,  
507 <https://www.sciencedirect.com/science/article/pii/S1359029420301230>.
- 508 22. Nott, T. J., T. D. Craggs, and A. J. Baldwin. 2016. Membraneless organelles can melt nucleic acid duplexes  
509 and act as biomolecular filters. *Nat Chem*. 8(6):569-575, doi: 10.1038/nchem.2519,  
510 <https://www.ncbi.nlm.nih.gov/pubmed/27219701>.
- 511 23. Wei, M.-T., S. Elbaum-Garfinkle, A. S. Holehouse, C. C.-H. Chen, M. Feric, C. B. Arnold, R. D. Priestley, R.  
512 V. Pappu, and C. P. Brangwynne. 2017. Phase behaviour of disordered proteins underlying low density and  
513 high permeability of liquid organelles. *Nat Chem*. 9(11):1118-1125, doi: 10.1038/nchem.2803,  
514 <https://doi.org/10.1038/nchem.2803>.
- 515 24. Elbaum-Garfinkle, S., Y. Kim, K. Szczepaniak, C. C. Chen, C. R. Eckmann, S. Myong, and C. P. Brangwynne.  
516 2015. The disordered P granule protein LAF-1 drives phase separation into droplets with tunable viscosity and  
517 dynamics. *Proc Natl Acad Sci U S A*. 112(23):7189-7194, doi: 10.1073/pnas.1504822112,  
518 <https://www.ncbi.nlm.nih.gov/pubmed/26015579>.
- 519 25. Mitrea, D. M., J. A. Cika, C. S. Guy, D. Ban, P. R. Banerjee, C. B. Stanley, A. Nourse, A. A. Deniz, and R. W.  
520 Kriwacki. 2016. Nucleophosmin integrates within the nucleolus via multi-modal interactions with proteins  
521 displaying R-rich linear motifs and rRNA. *eLife*. 5, doi: 10.7554/eLife.13571,  
522 <https://www.ncbi.nlm.nih.gov/pubmed/26836305>.
- 523 26. Brangwynne, C. P., P. Tompa, and R. V. Pappu. 2015. Polymer physics of intracellular phase transitions. *Nat*  
524 *Phys*. 11(11):899-904, doi: 10.1038/nphys3532.
- 525 27. Rivas, G., and A. P. Minton. 2018. Toward an understanding of biochemical equilibria within living cells.  
526 *Biophys Rev*. 10(2):241-253, doi: 10.1007/s12551-017-0347-6,  
527 <https://www.ncbi.nlm.nih.gov/pubmed/29235084>.

- 528 28. Horvath, I., R. Kumar, and P. Wittung-Stafshede. 2021. Macromolecular crowding modulates alpha-synuclein  
529 amyloid fiber growth. *Biophys J.* 120(16):3374-3381, doi: 10.1016/j.bpj.2021.06.032,  
530 <https://www.ncbi.nlm.nih.gov/pubmed/34242594>.
- 531 29. Ferrolino, M. C., D. M. Mitrea, J. R. Michael, and R. W. Kriwacki. 2018. Compositional adaptability in  
532 NPM1-SURF6 scaffolding networks enabled by dynamic switching of phase separation mechanisms. *Nat*  
533 *Commun.* 9(1):5064, doi: 10.1038/s41467-018-07530-1, <https://www.ncbi.nlm.nih.gov/pubmed/30498217>.
- 534 30. Mitrea, D. M., J. A. Cika, C. B. Stanley, A. Nourse, P. L. Onuchic, P. R. Banerjee, A. H. Phillips, C. G. Park,  
535 A. A. Deniz, and R. W. Kriwacki. 2018. Self-interaction of NPM1 modulates multiple mechanisms of liquid-  
536 liquid phase separation. *Nat Commun.* 9(1):842, doi: 10.1038/s41467-018-03255-3,  
537 <https://www.ncbi.nlm.nih.gov/pubmed/29483575>.
- 538 31. Yang, P., C. Mathieu, R. M. Kolaitis, P. Zhang, J. Messing, U. Yurtsever, Z. Yang, J. Wu, Y. Li, Q. Pan, J. Yu,  
539 E. W. Martin, T. Mittag, H. J. Kim, and J. P. Taylor. 2020. G3BP1 is a tunable switch that triggers phase  
540 separation to assemble stress granules. *Cell.* 181(2):325-345 e328, doi: 10.1016/j.cell.2020.03.046,  
541 <https://www.ncbi.nlm.nih.gov/pubmed/32302571>.
- 542 32. Guillen-Boixet, J., A. Kopach, A. S. Holehouse, S. Wittmann, M. Jahnel, R. Schlussler, K. Kim, I. Trussina, J.  
543 Wang, D. Mateju, I. Poser, S. Maharana, M. Ruer-Gruss, D. Richter, X. Zhang, Y. T. Chang, J. Guck, A.  
544 Honigmann, J. Mahamid, A. A. Hyman, R. V. Pappu, S. Alberti, and T. M. Franzmann. 2020. RNA-induced  
545 conformational switching and clustering of G3BP drive stress granule assembly by condensation. *Cell.*  
546 181(2):346-361 e317, doi: 10.1016/j.cell.2020.03.049, <https://www.ncbi.nlm.nih.gov/pubmed/32302572>.
- 547 33. Bouchard, J. J., J. H. Otero, D. C. Scott, E. Szulc, E. W. Martin, N. Sabri, D. Granata, M. R. Marzahn, K.  
548 Lindorff-Larsen, X. Salvatella, B. A. Schulman, and T. Mittag. 2018. Cancer mutations of the tumor  
549 suppressor SPOP disrupt the formation of active, phase-separated compartments. *Mol Cell.* 72(1):19-36 e18,  
550 doi: 10.1016/j.molcel.2018.08.027, <https://www.ncbi.nlm.nih.gov/pubmed/30244836>.
- 551 34. Rayman, J. B., K. A. Karl, and E. R. Kandel. 2018. TIA-1 self-multimerization, phase separation, and  
552 recruitment into stress granules are dynamically regulated by Zn(2). *Cell Rep.* 22(1):59-71, doi:  
553 10.1016/j.celrep.2017.12.036, <https://www.ncbi.nlm.nih.gov/pubmed/29298433>.
- 554 35. Kojima, T., and S. Takayama. 2018. Membraneless compartmentalization facilitates enzymatic cascade  
555 reactions and reduces substrate inhibition. *ACS Appl Mater Interfaces.* 10(38):32782-32791, doi:  
556 10.1021/acsami.8b07573, <https://www.ncbi.nlm.nih.gov/pubmed/30179001>.
- 557 36. Crowe, C. D., and C. D. Keating. 2018. Liquid-liquid phase separation in artificial cells. *Interface Focus.*  
558 8(5):20180032, doi: 10.1098/rsfs.2018.0032, <https://www.ncbi.nlm.nih.gov/pubmed/30443328>.
- 559 37. Ghosh, A., K. Mazarakos, and H. X. Zhou. 2019. Three archetypical classes of macromolecular regulators of  
560 protein liquid-liquid phase separation. *Proc Natl Acad Sci U S A.* 116(39):19474-19483, doi:  
561 10.1073/pnas.1907849116, <https://www.ncbi.nlm.nih.gov/pubmed/31506351>.
- 562 38. Schuster, B. S., E. H. Reed, R. Parthasarathy, C. N. Jahnke, R. M. Caldwell, J. G. Bermudez, H. Ramage, M.  
563 C. Good, and D. A. Hammer. 2018. Controllable protein phase separation and modular recruitment to form  
564 responsive membraneless organelles. *Nat Commun.* 9(1):2985, doi: 10.1038/s41467-018-05403-1,  
565 <https://www.ncbi.nlm.nih.gov/pubmed/30061688>.
- 566 39. Kaur, T., I. Alshareedah, W. Wang, J. Ngo, M. M. Moosa, and P. R. Banerjee. 2019. Molecular crowding tunes  
567 material states of ribonucleoprotein condensates. *Biomolecules.* 9(2), doi: 10.3390/biom9020071,  
568 <https://www.ncbi.nlm.nih.gov/pubmed/30791483>.
- 569 40. Yewdall, N. A., A. A. M. André, M. H. I. van Haren, F. H. T. Nelissen, A. Jonker, and E. Spruijt. 2021.  
570 ATP:Mg+2 shapes condensate properties of rRNA-NPM1; nucleolus model and its partitioning of ribosomes.  
571 *bioRxiv*.2021.2012.2022.473778, doi: 10.1101/2021.12.22.473778,  
572 <http://biorxiv.org/content/early/2021/12/22/2021.12.22.473778.abstract>.
- 573 41. Proudnikov, D., and A. Mirzabekov. 1996. Chemical Methods of DNA and RNA Fluorescent Labeling.  
574 *Nucleic Acids Research.* 24(22):4535-4542, doi: 10.1093/nar/24.22.4535,  
575 <https://doi.org/10.1093/nar/24.22.4535>.
- 576 42. Reines, S. A., and C. R. Cantor. 1974. New fluorescent hydrazide reagents for the oxidized 3'-terminus of  
577 RNA. *Nucleic Acids Research.* 1(6):767-786, doi: 10.1093/nar/1.6.767, <https://doi.org/10.1093/nar/1.6.767>.
- 578 43. Taylor, N. O., M. T. Wei, H. A. Stone, and C. P. Brangwynne. 2019. Quantifying Dynamics in Phase-  
579 Separated Condensates Using Fluorescence Recovery after Photobleaching. *Biophys J.* 117(7):1285-1300, doi:  
580 10.1016/j.bpj.2019.08.030, <https://www.ncbi.nlm.nih.gov/pubmed/31540706>.
- 581 44. Mitrea, D. M., B. Chandra, M. C. Ferrolino, E. B. Gibbs, M. Tolbert, M. R. White, and R. W. Kriwacki. 2018.  
582 Methods for physical characterization of phase-separated bodies and membrane-less organelles. *J Mol Biol.*  
583 430(23):4773-4805, doi: 10.1016/j.jmb.2018.07.006, <https://www.ncbi.nlm.nih.gov/pubmed/30017918>.
- 584 45. Choi, S., M. O. Meyer, P. C. Bevilacqua, and C. D. Keating. 2022. Phase-specific RNA accumulation and  
585 duplex thermodynamics in multiphase coacervate models for membraneless organelles. *Nat Chem.* doi:  
586 10.1038/s41557-022-00980-7, <https://www.ncbi.nlm.nih.gov/pubmed/35773489>.
- 587 46. Bader, A. N., E. G. Hofman, J. Voortman, P. M. en Henegouwen, and H. C. Gerritsen. 2009. Homo-FRET  
588 imaging enables quantification of protein cluster sizes with subcellular resolution. *Biophys J.* 97(9):2613-2622,  
589 doi: 10.1016/j.bpj.2009.07.059, <https://www.ncbi.nlm.nih.gov/pubmed/19883605>.



- 590 47. Dong, X., A. Al-Jumaily, and I. C. Escobar. 2018. Investigation of the use of a bio-derived solvent for non-  
591 solvent-induced phase separation (NIPS) fabrication of polysulfone membranes. *Membranes*. 8(2), doi:  
592 10.3390/membranes8020023, <https://www.ncbi.nlm.nih.gov/pubmed/29735925>.
- 593 48. Dupuis, N. F., E. D. Holmstrom, and D. J. Nesbitt. 2014. Molecular-crowding effects on single-molecule RNA  
594 folding/unfolding thermodynamics and kinetics. *Proc Natl Acad Sci U S A*. 111(23):8464-8469, doi:  
595 10.1073/pnas.1316039111, <https://www.ncbi.nlm.nih.gov/pubmed/24850865>.
- 596 49. Daher, M., J. R. Widom, W. Tay, and N. G. Walter. 2018. Soft interactions with model crowders and non-  
597 canonical interactions with cellular proteins stabilize RNA folding. *J Mol Biol*. 430(4):509-523, doi:  
598 10.1016/j.jmb.2017.10.030, <https://www.ncbi.nlm.nih.gov/pubmed/29128594>.
- 599 50. Marianelli, A. M., B. M. Miller, and C. D. Keating. 2018. Impact of macromolecular crowding on  
600 RNA/spermine complex coacervation and oligonucleotide compartmentalization. *Soft Matter*. 14(3):368-378,  
601 doi: 10.1039/c7sm02146a, <https://www.ncbi.nlm.nih.gov/pubmed/29265152>.
- 602 51. Qian, D., T. J. Welsh, N. A. Erkamp, S. Qamar, J. Nixon-Abell, G. Krainer, P. S. George-Hyslop, T. C. T.  
603 Michaels, and T. P. J. Knowles. 2022. Tie-lines reveal interactions driving heteromolecular condensate  
604 formation. *bioRxiv*.2022.2002.2022.481401, doi: 10.1101/2022.02.22.481401,  
605 <http://biorxiv.org/content/early/2022/03/01/2022.02.22.481401.abstract>.
- 606 52. Groen, J., D. Foschepoth, E. te Brinke, A. J. Boersma, H. Imamura, G. Rivas, H. A. Heus, and W. T. S. Huck.  
607 2015. Associative interactions in crowded solutions of biopolymers counteract depletion effects. *J Am Chem*  
608 *Soc*. 137(40):13041-13048, doi: 10.1021/jacs.5b07898, <https://www.ncbi.nlm.nih.gov/pubmed/26383885>.
- 609 53. Zwicker, D., and L. Laan. 2022. Evolved interactions stabilize many coexisting phases in multicomponent  
610 liquids. *Proc Natl Acad Sci U S A*. 119(28), doi: 10.1073/pnas.2201250119.

611
